# Supplementary material
Source: PubMed Central journal article supplement (PMC3391020)
Supplement: cr201245x1.pdf [file cr201245x1.pdf]

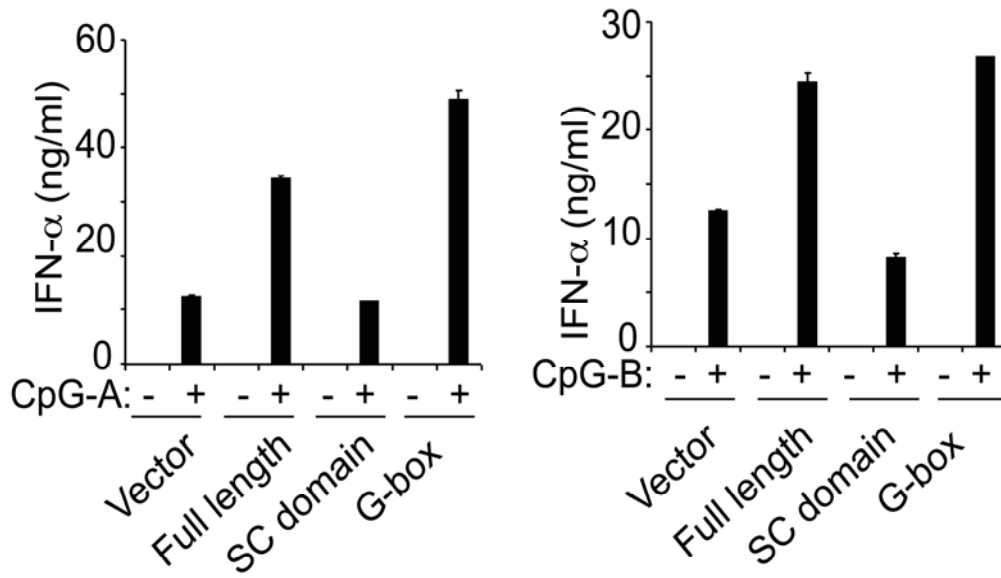

**Supplementary information, Figure S1** PLSCR1 and TLR9 interaction is necessary for IFN- $\alpha$  production. A human pDC cell line were transfected with Vector (pCMV-myc), full length PLSCR1, Scramblase domain, and G-box binding domain of PLSCR1 for 48 hours followed by stimulation with CpG-A (1 $\mu$ M) or CpG-B (0.5  $\mu$ M) for 20 h in 96-well culture plates. IFN- $\alpha$  production was measured by ELISA. These data are representative of two independent experiments performed in duplicates.
