# Supplementary material
Source: PubMed Central journal article supplement (PMC3391020)
Supplement: cr201245x2.pdf [file cr201245x2.pdf]

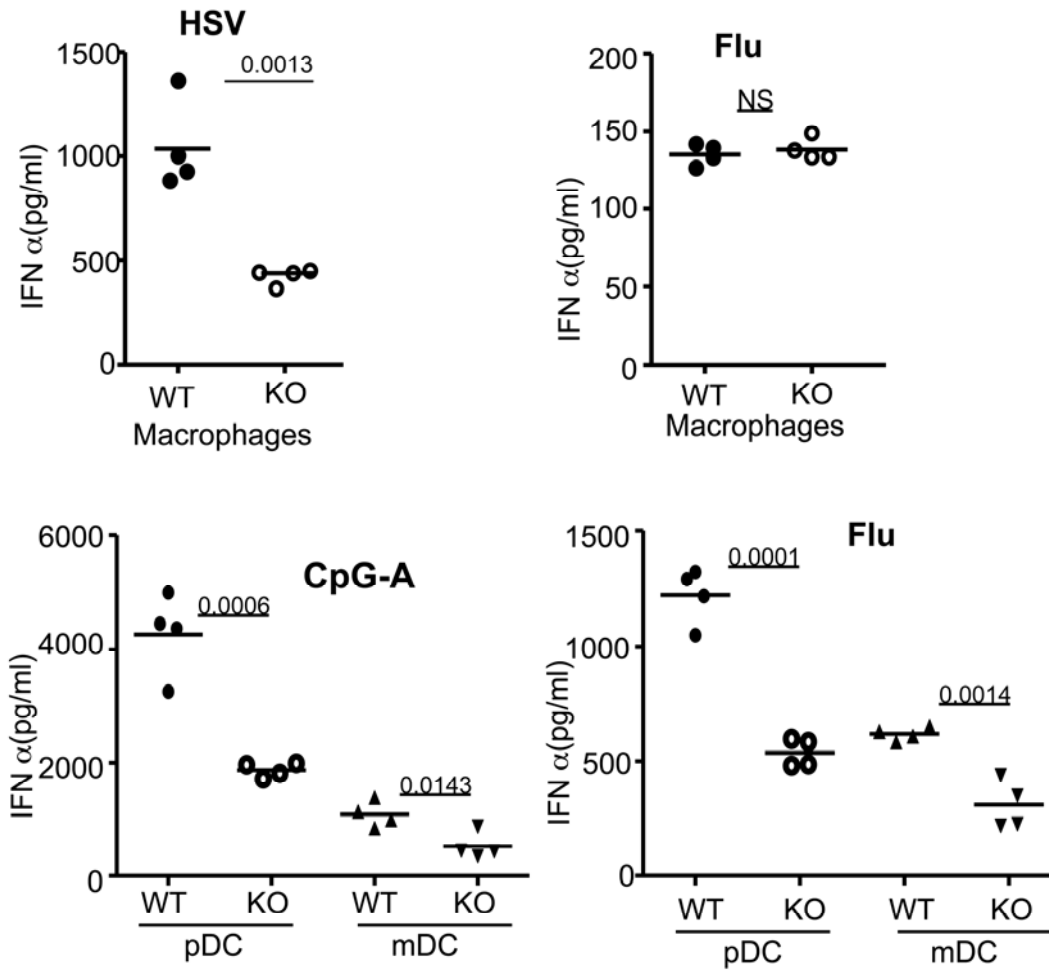

**Supplementary information, Figure S2** Responses of TLR9 and TLR7/8 pathway in macrophages and in mDC. The type 1 interferferon production was measured from BM-derived macrophages and monocyte-derived dendritic cells (mDC) as well as from pDC of WT and KO mice stimulated by CpG-A, Flu and HSV. These data are representative of two independent experiments performed in duplicates.
